# Supplementary material for: Alterations of phenotype, physiology, and functional substances reveal the chilling-tolerant mechanism in two common Olea Europaea cultivars
Source: Front Plant Sci. 2023 Feb 1;14:1046719. doi: 10.3389/fpls.2023.1046719 (PMC9930102; doi:10.3389/fpls.2023.1046719)
Supplement: Supplementary file 1 [file Table_1.xlsx]

## Sheet: S1 Primers for qRT-PCR
No.	Name	Forward primer (5'->3')	Reverse primer (5'->3')
1	EVM0059485	GGTGCTACAGACCCTTACCG	TGATCTGGGGGAATGCCT
2	EVM0034154	TTCGACGCGGATTGACACTT	TCAGTCCTTTCTGCTGCCTG
3	EVM0004461	GAATGCTTAAGGTGTTTGCAGC	GCTTGTTTGGTTCCCATGCC
4	EVM0023929	TGCACGTGTAGTACAACCTC	AGTGTGTATTGGCTAAGGGGT
5	EVM0025994	CCAACCCTTCAAGCCTGGAT	TGAGTGAGTGCAATGCTTGTG
6	EVM0052591	CCGTTGGAACTACGTCGTCA	ACTCCGGTAATATGCAGGCG
7	EVM0013996	TTTTCATCGCCTTTTCGGGG	CACCTCGAAGCTTTCTTGCC
8	EVM0054314	CCTGCATTCGTCCAATCCCT	AACGGCACCCCATGATTGAT
9	EVM0050359	ATTTCTGCAGCCCTTTGCCT	GCCAGAAAACTAAGGAGCCGA
10	EVM0041898	TACACCGCCGCCATAGTTTT	TCCGGTTTTGTACCGACAGG
11	EVM0030805	GCATTTGTGTCAACGACGCT	ACTTCATGTCTTTGCACGCAC
12	EVM0061178	TCAGACTGCCATATCCGTGC	TCAACCAAGAACGCCGATCA
13	GAPDH	TTGGCATCGTTGAGGGTCT	CAGTGGGAACACGGAAAGC

## Sheet: S2 Identified metabolites
Number	Name	Formula	Molecular Weight	m/z
m001	D-(-)-Quinic acid	C7 H12 O6	192.063	191.056
m002	Azelaic acid	C9 H16 O4	188.105	189.112
m003	Saikosaponin E	C42 H68 O12	764.468	765.475
m004	Gallic acid	C7 H6 O5	170.022	169.014
m005	2-Oxoadipic acid	C6 H8 O5	160.037	161.044
m006	Coumarin-3-carboxylic acid	C10 H6 O4	190.027	191.034
m007	Poricoic acid B	C30 H44 O5	484.319	485.326
m008	Maslinic acid	C30 H48 O4	489.382	490.389
m009	2,4-Dimethylbenzaldehyde	C9 H10 O	134.073	135.08
m010	3-Amino-4-methylpentanoic acid	C6 H13 N O2	131.095	132.102
m011	L(-)-Malic acid	C4 H6 O5	134.022	135.029
m012	4-Acetamidobutyric Acid	C6 H11 N O3	145.074	146.081
m013	N-Methyl-a-aminoisobutyric acid	C5 H11 N O2	117.079	118.086
m014	Myristic acid	C14 H28 O2	228.209	229.216
m015	4-(2-thienyl) benzoic acid	C11 H8 O2 S	204.027	203.02
m016	18-β-Glycyrrhetinic acid	C30 H46 O4	470.339	471.347
m017	2-Furoic acid	C5 H4 O3	130.027	129.019
m018	4-Oxo-5-phenylpentanoic acid	C11 H12 O3	214.063	215.07
m019	Sebacic acid	C10 H18 O4	202.12	201.113
m020	L-Threonic acid	C4 H8 O5	136.037	135.03
m021	Fumaric acid	C4 H4 O4	116.011	115.004
m022	12-Oxo phytodienoic acid	C18 H28 O3	292.204	293.211
m023	2-Oxoglutaric acid	C5 H6 O5	146.022	145.014
m024	2,6-Dihydroxybenzoic acid	C7 H6 O4	154.026	155.034
m025	D-Gluconic acid	C6 H12 O7	196.058	195.051
m026	D-3-Phosphoglyceric acid	C3 H7 O7 P	185.993	184.985
m027	Syringic acid	C9 H10 O5	198.053	197.045
m028	Tartaric acid	C4 H6 O6	150.016	184.985
m029	Methylmalonic acid	C4 H6 O4	118.027	117.019
m030	2-Anisic acid	C8 H8 O3	174.032	175.039
m031	Usnic acid	C18 H16 O7	344.089	345.097
m032	14,15-Dehydrocrepenynic acid	C18 H28 O2	276.209	275.202
m033	Citric acid	C6 H8 O7	192.027	191.02
m034	2-Isopropylmalic acid	C7 H12 O5	176.068	175.061
m035	Adipic acid	C6 H10 O4	146.058	147.065
m036	Pseudolaric Acid B	C23 H28 O8	432.178	433.185
m037	Coumalic acid	C6 H4 O4	140.011	139.004
m038	5-Phenyl-2,4-pentadienoic acid	C11 H10 O2	174.068	175.075
m039	Hydroxycitric acid	C6 H8 O8	208.022	207.015
m040	Dehydropachymic Acid	C33 H50 O5	526.366	527.373
m041	Gentisic acid	C7 H6 O4	154.027	153.019
m042	Malonic acid	C3 H4 O4	104.011	103.004
m043	Dihydroartemisinic acid	C15 H24 O2	236.177	237.184
m044	TriacetonaMine	C9 H17 N O	155.131	156.138
m045	3-Dehydroshikimic acid	C7 H8 O5	172.037	171.03
m046	1,2-Benzenedicarboxylic acid	C8 H6 O4	166.027	167.034
m047	2-Aminoadipic acid	C6 H11 N O4	161.069	162.076
m048	D-Saccharic acid	C6 H10 O8	210.038	209.03
m049	Myristoleic Acid	C14 H26 O2	226.193	227.2
m050	Deacetylasperulosidic acid	C16 H22 O11	407.142	408.15
m051	Pentadecanoic Acid	C15 H30 O2	288.23	287.223
m052	Cinnamic Acid	C9 H8 O2	148.052	149.06
m053	Chlorogenic acid	C16 H18 O9	354.095	353.088
m054	(+)-Dihydrojasmonic acid	C12 H20 O3	212.141	211.134
m055	Benzoic acid	C7 H6 O2	122.037	121.03
m056	4-O-p-Coumaroylquinic acid	C16 H18 O8	338.1	337.093
m057	Heptadecanoic Acid	C17 H34 O2	292.24	293.247
m058	Phenylglyoxylic acid	C8 H6 O3	150.032	149.024
m059	Pyrrole-2-carboxylic acid	C5 H5 N O2	111.032	110.025
m060	p-Aminocinnamic acid	C9 H9 N O2	163.064	162.056
m061	Pachymic acid	C33 H52 O5	528.381	529.389
m062	3,4,5-Trimethoxycinnamic acid	C12 H14 O5	238.084	239.091
m063	O-p-coumaroyl-O-salicyloyl quinic acid	C23 H22 O10	458.12	457.113
m064	Shikimic Acid	C7 H10 O5	174.053	173.046
m065	Vanillactic acid	C10 H12 O5	212.068	211.061
m066	4-oxododecanedioic acid	C12 H20 O5	226.12	227.127
m067	3-Indolepropionic acid	C11 H11 N O2	189.079	190.086
m068	trans-Aconitic acid	C6 H6 O6	174.016	173.009
m069	Ganoderic acid A	C30 H44 O7	516.309	517.316
m070	Capric acid	C10 H20 O2	172.146	173.154
m071	4-acetyl-4-(ethoxycarbonyl) heptanedioic acid	C12 H18 O7	274.103	275.11
m072	3-Methoxycinnamic acid	C10 H10 O3	160.052	161.059
m073	β-D-Glucopyranuronic acid	C6 H10 O7	194.043	193.035
m074	Mevalonic acid	C6 H12 O4	148.074	147.066
m075	3-Furoic acid	C5 H4 O3	112.016	111.009
m076	DL-Malic acid	C4 H6 O5	134.022	133.014
m077	Glycyrrhetinic acid	C30 H46 O4	470.341	469.333
m078	3-Isopropylmalic acid	C7 H12 O5	176.069	175.061
m079	Pheophorbide A	C35 H36 N4 O5	592.268	593.276
m080	2,6-Diaminooimelic Acid	C7 H14 N2 O4	190.095	191.102
m081	Mycophenolic acid	C17 H20 O6	342.107	343.115
m082	16-Hydroxyhexadecanoic acid	C16 H32 O3	254.224	253.217
m083	N-Acetyl-1-aspartylglutamic acid	C11 H16 N2 O8	304.096	303.089
m084	Oleanic acid	C30 H48 O3	456.362	457.369
m085	Corchorifatty acid F	C18 H32 O5	328.225	327.218
m086	10-Deacetylasperulosidic acid	C16 H22 O11	390.116	391.123
m087	Roburic acid	C30 H48 O2	440.365	441.373
m088	Sinapinic acid	C11 H12 O5	224.068	225.075
m089	Palmitic Acid	C16 H32 O2	273.267	274.274
m090	Ganoderic acid C2	C30 H46 O7	518.324	519.332
m091	1-O-Feruloyl quinic acid	C17 H20 O9	368.111	367.104
m092	Methylenesuccinic acid	C5 H6 O4	130.027	129.019
m093	Salicylic acid	C7 H6 O3	138.032	137.024
m094	Aleuritic Acid	C16 H32 O5	304.225	303.217
m095	DL-alpha-Methoxyphenylacetic acid	C9 H10 O3	120.058	119.05
m096	(R)-3-Hydroxy myristic acid	C14 H28 O3	244.204	243.196
m097	Gluconic acid	C6 H12 O7	196.058	195.051
m098	Levulinic acid	C5 H8 O3	116.047	117.055
m099	Salvianolic acid A	C26 H22 O10	494.123	495.13
m100	2-(2-acetyl-3,5-dihydroxyphenyl)acetic acid	C10 H10 O5	210.053	211.06
m101	3,5-Dihydroxybenzoic acid	C7 H6 O4	154.027	153.019
m102	Citramalate	C5 H8 O5	148.037	147.03
m103	Perillic acid	C10 H14 O2	166.099	165.092
m104	Mucic acid	C6 H10 O8	164.032	163.025
m105	Glutaric Acid	C5 H8 O4	132.042	115.039
m106	5-O-Caffeoylshikimic acid	C16 H16 O8	336.084	337.091
m107	Ursolic acid	C30 H48 O3	456.361	455.353
m108	Itaconic acid	C5 H6 O4	130.027	129.019
m109	Nodularin	C41 H60 N8 O10	824.454	825.461
m110	P-Aminohippuric Acid	C9 H10 N2 O3	194.068	193.061
m111	Lactobionic acid	C12 H22 O12	358.111	357.104
m112	3-hydroxy-3-methylpentanedioic acid	C6 H10 O5	184.037	185.044
m113	D-threo-Isocitric acid	C6 H8 O7	192.027	193.034
m114	Loganic acid	C16 H24 O10	376.136	421.133
m115	Mevalonolactone	C6 H10 O3	130.063	131.07
m116	Wilforlide A	C30 H46 O3	454.345	455.352
m117	Triptolide	C20 H24 O6	360.157	361.165
m118	Abscisic acid glucose ester	C21 H30 O9	426.189	427.196
m119	Methyl cinnamate	C10 H10 O2	162.068	163.075
m120	8-O-acetyl shanzhiside methyl ester	C19 H28 O12	448.158	449.165
m121	Celastrol	C29 H38 O4	450.275	451.282
m122	Methyl gallate	C8 H8 O5	184.037	167.034
m123	Bergenin	C14 H16 O9	328.079	327.072
m124	Oxypeucedanin	C16 H14 O5	286.084	287.091
m125	Bruceine D	C20 H26 O9	410.157	411.165
m126	Methyl palmitate	C17 H34 O2	287.282	288.289
m127	delta-Tridecalactone	C13 H24 O2	212.178	213.185
m128	Aloesin	C19 H22 O9	394.127	393.119
m129	Lactucin	C15 H16 O5	276.1	275.092
m130	Griffonilide	C8 H8 O4	168.042	167.035
m131	Bornyl acetate	C12 H20 O2	196.146	195.139
m132	delta-Hexanolactone	C6 H10 O2	114.068	113.061
m133	Methyl linolenate	C19 H32 O2	292.24	291.233
m134	Toddalolactone	C16 H20 O6	308.127	309.132
m135	Dodecanedioic acid	C12 H22 O4	230.152	229.144
m136	Ligustilide	C12 H14 O2	190.099	191.106
m137	Tenuifoliside A	C31 H38 O17	682.213	681.206
m138	Ethyl ferulate	C12 H14 O4	222.089	223.096
m139	Picrotoxinin	C15 H16 O6	292.095	291.087
m140	Monoolein	C21 H40 O4	356.292	357.299
m141	Cinnamyl acetate	C11 H12 O2	176.084	177.091
m142	Tanshinlactone	C17 H12 O3	264.078	265.085
m143	Ethyl oleate	C20 H38 O2	310.287	311.294
m144	2-Arachidonoyl glycerol	C23 H38 O4	378.274	379.281
m145	Limonin	C26 H30 O8	470.192	471.199
m146	Ginkgolide K	C20 H22 O9	406.126	407.133
m147	Neocnidilide	C12 H18 O2	194.131	195.138
m148	Heteroclitin D	C27 H30 O8	482.195	483.202
m149	D-Glucono-1,5-lactone	C6 H10 O6	238.069	237.061
m150	7-demethylsuberosin	C14 H14 O3	230.094	231.101
m151	Propylparaben	C10 H12 O3	180.079	179.071
m152	4-Demethylepipodophyllotoxin	C21 H20 O8	400.116	401.122
m153	Praeruptorin B	C24 H26 O7	426.167	427.175
m154	Methyl dihydrojasmonate	C13 H22 O3	226.157	227.164
m155	Schisantherin E	C30 H34 O9	538.219	539.227
m156	Decursin	C19 H20 O5	328.131	327.124
m157	Deguelin	C23 H22 O6	394.143	393.136
m158	Linderane	C15 H16 O4	260.105	259.097
m159	Suberosin	C15 H16 O3	244.11	243.102
m160	Eupalinolide A	C24 H30 O9	462.191	461.184
m161	Dimethyl succinate	C6 H10 O4	146.058	147.065
m162	Flavokawain A	C18 H18 O5	314.116	313.109
m163	Ethyl paraben	C9 H10 O3	166.063	167.07
m164	δ-Ribono-1,4-lactone	C5 H8 O5	148.037	147.03
m165	Methyl oleate	C19 H36 O2	296.271	297.279
m166	Auraptene	C19 H22 O3	298.157	299.164
m167	Wedelolactone	C16 H10 O7	314.043	313.036
m168	2,3-dihydroxypropyl 12-methyltridecanoate	C17 H34 O4	324.23	325.237
m169	Gluconolactone	C6 H10 O6	178.048	177.041
m170	Triethyl citrate	C12 H20 O7	276.121	275.113
m171	Bilobalide	C15 H18 O8	326.1	325.093
m172	Kuwanon A	C25 H24 O6	420.157	421.164
m173	Linarin	C28 H32 O14	592.179	593.186
m174	Naringerin	C15 H12 O5	272.068	273.075
m175	Laricitrin	C16 H12 O8	332.053	331.046
m176	Isosakuranetin	C16 H14 O5	286.084	287.091
m177	Apigenin	C15 H10 O5	270.053	271.06
m178	3-Hydroxyflavone	C15 H10 O3	200.106	239.069
m179	Hesperetin	C16 H14 O6	302.079	303.086
m180	Irisflorentin	C20 H18 O8	386.1	387.107
m181	Irigenin	C18 H16 O8	360.084	361.091
m182	Naringenin	C15 H12 O5	272.068	271.061
m183	Taxifolin	C15 H12 O7	304.058	305.065
m184	Chrysin	C15 H10 O4	254.058	255.065
m185	Naringin	C27 H32 O14	580.18	579.173
m186	(-)-Epigallocatechin	C15 H14 O7	306.071	307.079
m187	Flavanone	C15 H12 O2	224.083	225.09
m188	Heptamethoxyflavone	C22 H24 O9	432.141	431.134
m189	Tricin	C17 H14 O7	330.073	331.081
m190	Luteolin	C15 H10 O6	286.047	287.055
m191	6-Formyl-isoophiopogonanone A	C19 H16 O7	356.09	357.097
m192	Isorhamnetin	C16 H12 O7	316.058	317.065
m193	ladanein	C17 H14 O6	314.079	313.072
m194	Neohesperidin dihydrochalcone	C28 H36 O15	612.205	613.213
m195	Daidzein	C15 H10 O4	254.056	255.063
m196	Eupatilin	C18 H16 O7	344.09	343.082
m197	Methylophiopogonone A	C19 H16 O6	340.095	341.102
m198	Myricetin	C15 H10 O8	318.038	317.031
m199	6-Hydroxyflavone	C15 H10 O3	238.063	239.07
m200	Diosmetin	C16 H12 O6	300.063	301.07
m201	di-C,C-pentosyl-apigenin	C25 H26 O13	534.139	533.131
m202	Casticin	C19 H18 O8	374.1	373.092
m203	Ophiopogonanone E	C19 H20 O7	360.12	361.128
m204	Puerarin	C21 H20 O9	189.077	417.118
m205	Naringin dihydrochalcone	C27 H34 O14	599.224	622.213
m206	Isosakuranin	C22 H24 O10	448.135	449.142
m207	Didymin	C28 H34 O14	594.189	595.196
m208	Asperulosid	C18 H22 O11	414.114	415.121
m209	Tectochrysin	C16 H12 O4	268.073	269.08
m210	Anhydroicaritin	C21 H20 O6	368.126	369.133
m211	Nobiletin	C21 H22 O8	402.13	403.138
m212	Baohuoside I	C27 H30 O10	514.184	515.191
m213	Complanatuside	C28 H32 O16	624.167	625.174
m214	Diosmetin-7-O-β-D-glucopyranoside	C22 H22 O11	462.117	463.125
m215	Icariin	C33 H40 O15	676.248	677.256
m216	Myricetin 3-O-galactoside	C21 H20 O13	480.091	479.083
m217	Vaccarin	C32 H38 O19	726.204	725.196
m218	Homoplantaginin	C22 H22 O11	462.117	463.125
m219	Baohuoside II	C26 H28 O10	500.168	499.161
m220	Methyl-Hesperidin	C29 H38 O16	642.216	687.216
m221	Hesperetin 5-O-glucoside	C22 H24 O11	464.132	463.124
m222	Tricin O-malonylhexoside	C26 H26 O15	578.128	577.121
m223	Tricin 5-O-hexoside	C23 H24 O12	492.127	537.125
m224	Neohesperidin	C28 H34 O15	610.191	609.184
m225	Arbutin	C12 H16 O7	272.089	271.082
m226	Poncirin	C28 H34 O14	594.193	595.201
m227	3',4',5'-Tricetin 5-O-hexoside	C24 H26 O12	506.141	507.148
m228	Eriodictyol	C15 H12 O6	288.063	287.056
m229	Myrtillin chloride	C21 H21 Cl O12	500.071	499.064
m230	Quercetin-3,4'-O-di-beta-glucopyranoside	C27 H30 O17	626.148	627.155
m231	Epimedin C	C39 H50 O19	822.298	821.291
m232	Rhoifolin	C27 H30 O14	578.163	579.171
m233	Typhaneoside	C34 H42 O20	770.23	769.221
m234	Plantagoside	C21 H22 O12	466.111	465.104
m235	Camelliaside A	C33 H40 O20	756.211	757.218
m236	Kaempferitrin	C27 H30 O14	578.165	577.157
m237	Tectoridin	C22 H22 O11	462.118	463.126
m238	3'-Methoxy Puerarin	C22 H22 O10	446.121	445.112
m239	Prunin	C21 H22 O10	434.122	435.129
m240	Isorhamnetin-3-glucoside	C22 H22 O12	478.109	479.117
m241	Kaempferol-3-gentiobioside	C27 H30 O16	610.154	609.146
m242	Rutin	C27 H30 O16	610.154	609.147
m243	Rhamnetin	C16 H12 O7	316.058	317.065
m244	Miquelianin	C21 H18 O13	478.078	477.071
m245	O-methylnaringenin C-pentoside	C21 H22 O9	418.124	419.132
m246	Scutellarin	C21 H18 O12	462.081	507.081
m247	Maltotriitol	C18 H34 O16	506.184	505.177
m248	Schisandrin C	C22 H24 O6	384.158	385.164
m249	Agarotetrol	C17 H18 O6	318.11	319.118
m250	Oxyresveratrol	C14 H12 O4	244.073	245.08
m251	Curcurbitacin IIA	C32 H50 O8	562.353	563.361
m252	Coniferyl alcohol	C10 H12 O3	163.056	164.063
m253	Estriol	C18 H24 O3	310.156	311.163
m254	Patchouli alcohol	C15 H26 O	222.198	223.206
m255	Lactitol	C12 H24 O11	344.132	343.125
m256	Tropine	C8 H15 N O	141.115	142.123
m257	Xylitol	C5 H12 O5	152.068	153.076
m258	Linustatin	C16 H27 N O11	426.189	427.196
m259	Protopanaxadiol	C30 H52 O3	460.392	461.399
m260	Olivetol	C11 H16 O2	180.115	181.122
m261	Ganoderiol A	C30 H46 O2	438.35	439.357
m262	Tyrosol	C8 H10 O2	138.068	137.061
m263	Ferruginol	C20 H30 O	286.229	287.237
m264	D-(-)-Mannitol	C6 H14 O6	182.079	181.072
m265	Linoleoyl ethanolamide	C20 H37 N O2	323.282	324.289
m266	2-Methoxyestradiol	C19 H26 O3	302.188	303.195
m267	Euphorbiasteroid	C32 H40 O8	552.27	553.277
m268	Rehmannioside D	C27 H42 O20	686.225	687.232
m269	3,4-Dihydroxyphenylglycol	C8 H10 O4	170.058	169.051
m270	Ingenol	C20 H28 O5	348.194	347.187
m271	Stigmasterol	C29 H48 O	412.371	413.378
m272	DL-threitol	C4 H10 O4	122.058	123.065
m273	L-Iditol	C6 H14 O6	182.079	183.086
m274	Cafestol	C20 H28 O3	316.204	317.211
m275	Tanshindiol C	C18 H16 O5	312.099	313.106
m276	Acetyl-trans-resveratrol	C20 H18 O6	354.112	355.119
m277	alpha-Zearalanol	C18 H26 O5	322.178	323.185
m278	Hydroxytyrosol	C8 H10 O3	154.063	155.07
m279	Panaxydol	C17 H24 O2	260.178	261.185
m280	Piceatannol	C14 H12 O4	262.084	263.091
m281	Vanillyl alcohol	C8 H10 O3	154.063	153.056
m282	Schizandrol A	C24 H32 O7	432.215	433.222
m283	R-Notoginsenoside R2	C41 H70 O13	770.484	769.477
m284	Calceolarioside B	C23 H26 O11	478.148	477.141
m285	Mogroside IV	C54 H92 O24	1124.6	563.308
m286	Skimmin	C15 H16 O8	324.085	323.077
m287	Lanatoside C	C49 H76 O20	984.495	493.255
m288	Prim-O-glucosylcimifugin	C22 H28 O11	468.164	467.154
m289	Trillin	C33 H52 O8	576.366	577.374
m290	Arctiin	C27 H34 O11	534.21	533.203
m291	Gardenoside	C17 H24 O11	404.13	809.268
m292	Sec-O-Glucosylhamaudol	C21 H26 O10	438.153	437.145
m293	Salidroside	C14 H20 O7	300.121	299.114
m294	Safflomin A	C27 H32 O16	612.171	611.163
m295	Ferulic acid O-hexoside	C16 H20 O9	356.111	355.104
m296	Licoagroside D	C22 H24 O10	448.138	449.146
m297	(+)-epipinoresinol-4-O-beta-D-glucoside	C26 H32 O11	520.195	521.201
m298	Swertiamarin	C16 H22 O10	374.121	375.128
m299	Sibirioside A	C21 H28 O12	472.156	471.147
m300	Lithospermoside	C14 H19 N O8	329.111	310.094
m301	Ajugol	C15 H24 O9	348.142	347.135
m302	Dihydroroseoside	C19 H32 O8	388.21	387.203
m303	Trigoneoside Xb	C45 H76 O19	902.492	901.484
m304	Hastatoside	C17 H24 O11	450.138	449.13
m305	Roseoside	C19 H30 O8	386.194	387.201
m306	Kinsenoside	C10 H16 O8	264.084	265.092
m307	Methylnissolin-3-O-glucoside	C23 H26 O10	462.151	463.159
m308	Rehmannioside A	C21 H32 O15	570.174	569.167
m309	D(+)-Melezitose O-rhamnoside	C24 H42 O20	650.224	649.217
m310	Angoroside C	C36 H48 O19	784.282	783.274
m311	Curculigoside	C22 H26 O11	466.147	467.154
m312	Cistanoside F	C21 H28 O13	488.153	487.146
m313	Harpagide	C15 H24 O10	364.137	365.144
m314	Ptaquiloside	C20 H30 O8	398.195	397.188
m315	Rhapontigenin 3'-O-glucoside	C21 H24 O9	420.14	421.149
m316	Momordin Ic	C41 H64 O13	764.432	765.439
m317	Sweroside	C16 H22 O9	358.126	359.133
m318	Timosaponin A1	C33 H54 O8	578.381	577.374
m319	Agnuside	C22 H26 O11	466.147	465.14
m320	Oleuropein	C25 H32 O13	540.186	539.179
m321	Phlorizin	C21 H24 O10	436.137	435.13
m322	Purpureaside C	C35 H46 O20	786.26	785.252
m323	Jionoside A1	C36 H48 O20	800.277	781.26
m324	Ixoside	C16 H20 O11	388.102	387.094
m325	7-O-Methylmangiferin	C20 H20 O11	436.101	435.094
m326	Liriopesides B	C39 H62 O12	722.427	721.42
m327	5-O-Methylvisammioside	C22 H28 O10	452.167	453.174
m328	trans-zeatin 9-O-glucoside	C16 H23 N5 O6	381.163	380.156
m329	Picroside I	C24 H28 O11	492.163	493.171
m330	Acetylharpagide	C17 H26 O11	406.148	405.141
m331	Ouabain	C29 H44 O12	584.281	585.288
m332	2-Methylbutyl beta-D-glucopyranoside	C11 H22 O6	296.147	295.14
m333	Orcinol gentiobioside	C19 H28 O12	448.158	447.151
m334	Tulipanin	C27 H31 O16	611.161	612.168
m335	Lobetyolin	C20 H28 O8	396.178	397.185
m336	O-p-Coumaroyl quinacyl quinic acid O-hexoside	C29 H38 O18	674.208	673.201
m337	trans-Zeatin-riboside	C15 H21 N5 O5	351.153	350.146
m338	Verbenalin	C17 H24 O10	388.137	389.144
m339	Dioscin	C45 H72 O16	868.48	869.489
m340	Orcinol glucoside	C13 H18 O7	286.105	287.112
m341	Verbascoside	C29 H36 O15	624.205	625.212
m342	Tracheloside	C27 H34 O12	550.206	549.199
m343	Isoliquiritin apioside	C26 H30 O13	550.167	551.173
m344	3-O-p-coumaroyl shikimic acid O-hexoside	C22 H26 O12	482.143	481.137
m345	Neonuezhenide	C31 H42 O18	702.237	703.246
m346	Polydatin	C20 H22 O8	390.132	389.124
m347	7-O-Ethylmorroniside	C19 H30 O11	434.179	433.172
m348	Steviolbioside	C32 H50 O13	642.328	641.321
m349	Chikusetsusponin Iva	C42 H66 O14	794.442	795.45
m350	Forsythoside B	C34 H44 O19	756.251	755.244
m351	Madecassoside	C48 H78 O20	974.513	973.505
m352	Rebaudioside C	C44 H70 O22	950.438	476.227
m353	Aucubin	C15 H22 O9	392.133	391.125
m354	Stevioside	C38 H60 O18	804.381	803.375
m355	Ziyuglycoside I	C41 H66 O13	766.448	767.456
m356	Caffeic acid O-glucoside	C15 H18 O9	342.096	341.088
m357	Sinapoyl O-hexoside	C17 H22 O10	386.122	385.114
m358	Tricin 4'-O-(beta-guaiacylglyceryl) ether 5-O-hexoside	C33 H36 O16	688.199	689.207
m359	Isomucronulatol-7-O-glucoside	C23 H28 O10	464.169	465.176
m360	Androsin	C15 H20 O8	328.116	327.108
m361	Akebia saponin D	C47 H76 O18	928.501	929.51
m362	Coniferin	C16 H22 O8	342.131	343.138
m363	2'-O-acetylpoliumoside	C37 H48 O20	812.275	811.268
m364	Gracillin	C45 H72 O17	884.481	883.474
m365	Ginsenoside F1	C36 H62 O9	638.44	637.433
m366	Ginsenoside-Ro	C48 H76 O19	956.497	957.503
m367	D-(-)-Glutamine	C5 H10 N2 O3	146.069	147.076
m368	N-Acetyl-L-Tyrosine	C11 H13 N O4	223.085	224.092
m369	L-Glutamic acid	C5 H9 N O4	147.053	148.06
m370	Oxidized glutathione	C20 H32 N6 O12 S2	612.151	307.083
m371	gamma-Glutamyltyrosine	C14 H18 N2 O6	310.116	311.123
m372	Cycloleucine	C6 H11 N O2	129.079	130.086
m373	5-oxoproline	C5 H7 N O3	129.043	128.035
m374	N-Acetyl-DL-glutamic acid	C7 H11 N O5	189.064	190.071
m375	L-Homoserine	C4 H9 N O3	119.058	120.066
m376	D-Phenylalanine	C9 H11 N O2	165.079	166.086
m377	N-Acetyl-L-valine	C7 H13 N O3	159.089	160.097
m378	Ala-gly	C5 H10 N2 O3	146.069	145.062
m379	S-Adenosyl-methionine	C22 H30 N6 O8 S2	570.159	569.152
m380	L-arginine	C6 H14 N4 O2	174.112	175.119
m381	S-Adenosyl-L-homocysteine	C14 H20 N6 O5 S	384.121	385.126
m382	Prolylleucine	C11 H20 N2 O3	228.147	229.155
m383	N-lactoyl-phenylalanine	C12 H15 N O4	237.1	238.107
m384	3-(Carboxycarbonyl)-L-alanine	C5 H8 N2 O5	175.963	174.956
m385	L-Glutathione (reduced)	C10 H17 N3 O6 S	307.084	306.076
m386	Homocysteic acid	C4 H9 N O5 S	183.021	184.028
m387	L-5-Hydroxytryptophan	C11 H12 N2 O3	220.085	221.092
m388	D-Proline	C5 H9 N O2	115.063	116.071
m389	O-Phospho-L-serine	C3 H8 N O6 P	185.009	184.002
m390	Plumbagin	C11 H8 O3	188.047	189.054
m391	N-Acetylphenylalanine	C11 H13 N O3	207.089	208.097
m392	N-alpha-Acetyl-L-Arginine	C8 H16 N4 O3	216.122	217.129
m393	Ademetionine	C15 H22 N6 O5 S	398.136	399.144
m394	Pipecolic acid	C6 H11 N O2	129.079	130.086
m395	L-Homocystine	C8 H16 N2 O4 S2	268.056	269.063
m396	N-Oleoyl Glycine	C20 H37 N O3	339.277	340.284
m397	Eugenol	C10 H12 O2	164.086	165.094
m398	Dehydroeffusol	C17 H14 O2	250.099	251.107
m399	Protosappanin B	C16 H16 O6	304.095	305.102
m400	Olivil	C20 H24 O7	376.152	377.159
m401	Trachelogenin	C21 H24 O7	388.151	389.158
m402	alpha-Mangostin	C24 H26 O6	410.173	411.18
m403	Resveratrol	C14 H12 O3	228.079	227.071
m404	Apocynin	C9 H10 O3	166.063	167.07
m405	m-Cresol	C7 H8 O	108.058	109.065
m406	Catechol	C6 H6 O2	110.037	111.044
m407	Loureirin A	C17 H18 O4	286.12	285.113
m408	Pterostilbene	C16 H16 O3	256.11	255.102
m409	Phloretin	C15 H14 O5	274.084	273.077
m410	Syringetin	C17 H14 O8	346.069	347.076
m411	Deoxyarbutin	C11 H14 O3	194.094	195.101
m412	Bakuchiol	C18 H24 O	256.182	257.19
m413	methylChrysoeriol C-hexoside	C23 H24 O11	476.132	477.138
m414	Sugiol	C20 H28 O2	300.208	601.422
m415	(-)-Arctigenin	C21 H24 O6	372.157	371.15
m416	(+)-Anwulignan	C20 H24 O4	328.167	327.16
m417	Glabrene	C20 H18 O4	322.12	323.128
m418	Wikstromol	C20 H22 O7	374.135	375.142
m419	Isorhapontigenin	C15 H14 O4	258.089	259.096
m420	Schisanhenol	C23 H30 O6	402.204	403.211
m421	Bisdemethoxycurcumin	C19 H16 O4	308.105	309.112
m422	Demethylzeylasteral	C29 H36 O6	480.249	481.257
m423	Cucurbitacin E	C32 H44 O8	556.304	557.311
m424	Betulin	C30 H50 O2	442.381	443.388
m425	Genipin	C11 H14 O5	226.084	227.091
m426	Citral	C10 H16 O	152.12	153.127
m427	Benzoylpaeoniflorin	C30 H32 O12	584.189	567.186
m428	Oleanolic acid	C30 H48 O3	438.349	439.357
m429	Catalpol	C15 H22 O10	362.121	361.114
m430	3-Carene	C10 H16	136.125	137.132
m431	Artemisinin	C15 H22 O5	282.146	283.154
m432	Canthaxanthin	C40 H52 O2	564.396	565.403
m433	Integrifoside A	C21 H36 O8	416.241	415.234
m434	Cucurbitacin I	C30 H42 O7	514.291	515.298
m435	Timosaponin A3	C39 H64 O13	740.434	741.441
m436	beta-Caryophyllene	C15 H24	204.188	205.195
m437	Toosendanin	C30 H38 O11	574.24	575.247
m438	Crocin I	C44 H64 O24	976.375	975.368
m439	Oridonin	C20 H28 O6	364.188	363.181
m440	Ligustroflavone	C33 H40 O18	724.221	725.229
m441	Alisol B	C30 H48 O4	472.356	473.363
m442	Asiaticoside	C48 H78 O19	958.512	959.52
m443	Sarracenin	C11 H14 O5	226.084	227.091
m444	(+)-Camphor	C10 H16 O	152.12	153.127
m445	Notoginsenoside R1	C47 H80 O18	932.531	933.538
m446	Cucurbitacin B	C32 H46 O8	558.321	559.326
m447	Maltopentaose	C30 H52 O26	828.274	829.281
m448	Stachyose	C24 H42 O21	666.224	665.216
m449	D-Xylulose	C5 H10 O5	150.053	149.046
m450	D-(+)-Glucose	C6 H12 O6	226.069	225.061
m451	Sinapaldehyde glucoside	C17 H22 O9	370.126	371.133
m452	Glucose 1-phosphate	C6 H13 O9 P	260.03	261.037
m453	Isomaltose	C12 H22 O11	342.118	343.125
m454	Sucrose	C12 H22 O11	342.116	341.109
m455	D-Erythrose 4-phosphate	C4 H9 O7 P	200.009	201.016
m456	D-(+)-Mannose	C6 H12 O6	180.063	215.033
m457	Sibiricose A6	C23 H32 O15	548.174	547.167
m458	D-(-)-Fructose	C6 H12 O6	180.063	179.056
m459	Trehalose 6-phosphate	C12 H23 O14 P	422.083	421.075
m460	D-(+)-Maltose	C12 H22 O11	364.098	365.105
m461	Melezitose	C18 H32 O16	504.169	505.177
m462	D-Sedoheptulose 7-phosphate	C7 H15 O10 P	308.051	289.033
m463	Maltotetraose	C24 H42 O21	688.204	689.211
m464	Nystose	C24 H42 O21	712.231	711.224
m465	Ribulose-5-phosphate	C5 H11 O8 P	230.019	231.026
m466	2-Deoxy-D-galactose	C6 H12 O5	164.068	165.076
m467	alpha-Lactose	C12 H22 O11	359.142	360.149
m468	alpha-Trehalose	C12 H22 O11	342.116	341.109
m469	D-Raffinose	C18 H32 O16	504.169	503.162
m470	D-Glucose 1-phosphate	C6 H13 O9 P	278.048	279.055
m471	Geranylacetone	C13 H22 O	194.167	195.174
m472	Acetophenone	C8 H8 O	120.058	121.065
m473	Shionone	C30 H50 O	426.386	427.394
m474	Chalcone	C15 H12 O	208.089	209.096
m475	Urolithin A	C13 H8 O4	228.042	229.049
m476	Methylophiopogonanone A	C19 H18 O6	342.11	360.144
m477	Myrislignan	C21 H26 O6	374.172	375.179
m478	3-Methylcrotonylglycine	C7 H11 N O3	157.074	158.081
m479	Shikonin	C16 H16 O5	135.044	136.052
m480	alpha-Ionone	C13 H20 O	192.151	193.159
m481	Lawsone	C10 H6 O3	174.032	175.039
m482	Dihydrokavain	C14 H16 O3	232.11	231.102
m483	Polygalaxanthone Ⅴ	C26 H30 O15	582.16	581.152
m484	Nortanshinone	C17 H12 O4	280.073	281.08
m485	4'-Hydroxypropiophenone	C9 H10 O2	150.068	149.061
m486	Estrone	C18 H22 O2	270.162	271.169
m487	Jasmone	C11 H16 O	164.12	165.127
m488	Dracorhodin	C17 H14 O3	266.094	267.101
m489	Aldosterone	C21 H28 O5	360.191	359.184
m490	Pterosin B	C14 H18 O2	218.131	219.138
m491	Ketoisophorone	C9 H12 O2	152.084	153.091
m492	Muscone	C16 H30 O	238.229	239.237
m493	Isotanshinone IIA	C19 H18 O3	294.126	293.119
m494	(+)-Bicuculline	C20 H17 N O6	367.107	368.115
m495	Rutaecarpine	C18 H13 N3 O	287.106	288.113
m496	Abrine	C12 H14 N2 O2	218.105	217.098
m497	lupinine	C10 H19 N O	169.147	170.154
m498	Theobromine	C7 H8 N4 O2	180.067	181.074
m499	Luotonin A	C18 H11 N3 O	285.086	286.093
m500	Aminophylline	C16 H24 N10 O4	420.2	419.193
m501	Scopolin	C16 H18 O9	354.095	355.103
m502	Hordatine B	C29 H40 N8 O5	580.311	579.303
m503	Cocamidopropyl betaine	C19 H38 N2 O3	342.288	343.295
m504	Trigonelline	C7 H7 N O2	137.048	138.055
m505	Leonurine Hydrochloride	C14 H22 Cl N3 O5	347.125	348.132
m506	Scopolamine	C17 H21 N O4	303.147	304.154
m507	Monocrotaline	C16 H23 N O6	325.151	326.158
m508	Leonurine	C14 H21 N3 O5	311.148	312.155
m509	Coptisine	C19 H14 N O4	320.093	319.086
m510	Piperlongumine	C17 H19 N O5	317.126	318.133
m511	Nicotinic Acid	C6 H5 N O2	123.032	124.039
m512	Pantothenic acid	C9 H17 N O5	219.111	220.118
m513	Biotin	C10 H16 N2 O3 S	488.179	489.187
m514	Vitamin B2	C17 H20 N4 O6	376.138	377.145
m515	Nicotinate ribonucleoside	C11 H13 N O6	255.074	256.081
m516	5-Methyltetrahydrofolic acid	C20 H25 N7 O6	459.19	458.182
m517	Folinic acid	C20 H23 N7 O7	473.166	474.173
m518	Biopterin	C9 H11 N5 O3	237.085	238.092
m519	Pyridoxine	C8 H11 N O3	169.074	170.081
m520	Vitamin B3	C6 H6 N2 O	122.048	123.055
m521	Thiamine	C12 H16 N4 O S	264.105	265.112
m522	Vitamin C	C6 H8 O6	176.032	177.039
m523	Nicotinamide	C6 H6 N2 O	122.048	123.055
m524	Riboflavin-5'-monophosphate	C17 H21 N4 O9 P	456.106	457.113
m525	Thiamine phosphate	C12 H18 Cl N4 O4 P S	380.046	379.04
m526	Riboflavin	C17 H20 N4 O6	376.135	377.142
m527	N-Coumaroyltyramine	C17 H17 N O3	283.121	284.128
m528	5-O-p-Coumaroyl shikimic acid	C16 H16 O7	320.091	321.098
m529	6-Methylcoumarin	C10 H8 O2	160.052	161.06
m530	6-hydroxy-7,8-dimethoxycoumarin	C11 H10 O5	222.052	223.06
m531	7-Methoxy-4-methylcoumarin	C11 H10 O3	190.063	191.07
m532	7-Hydroxycoumarin	C9 H6 O3	162.032	161.025
m533	4-Hydroxycoumarin	C9 H6 O3	162.032	161.025
m534	6,7-Dimethoxy-4-Methylcoumarin	C12 H12 O4	220.074	265.072
m535	Esculetin	C9 H6 O4	178.027	177.019
m536	Coumarin	C9 H6 O2	146.037	147.044
m537	6-Hydroxymethylherniarin	C11 H10 O4	206.058	207.065
m538	Phytanic acid	C20 H40 O2	312.303	313.31
m539	Octadec-9-ynoic acid	C18 H32 O2	262.229	263.237
m540	1,11-Undecanedicarboxylic acid	C13 H24 O4	244.167	243.16
m541	Palmitoleic Acid	C16 H30 O2	276.209	277.216
m542	1-Palmitoylglycerol	C19 H38 O4	330.277	331.284
m543	Oleic Acid	C18 H34 O2	282.256	283.263
m544	Hexadecanedioic acid	C16 H30 O4	286.214	285.207
m545	Linoleic acid	C18 H32 O2	280.24	281.247
m546	Arachidonic acid	C20 H32 O2	304.24	305.247
m547	Cinnamaldehyde	C9 H8 O	132.058	133.065
m548	Ferulaldehyde	C10 H10 O3	178.062	223.06
m549	Caffeic aldehyde	C9 H8 O3	164.047	163.04
m550	p-Anisaldehyde	C8 H8 O2	136.052	137.06
m551	Syringaldehyde	C9 H10 O4	182.058	181.051
m552	Glyceraldehyde3-phosphate	C3 H7 O6 P	169.998	171.005
m553	1-Naphthaleneacetic acid	C12 H10 O2	186.068	187.075
m554	Methyl jasmonate	C13 H20 O3	224.141	225.148
m555	(±)-Abscisic acid	C15 H20 O4	286.116	287.123
m556	Gibberellic acid	C19 H22 O6	346.141	347.149
m557	Jasmonic acid	C12 H18 O3	210.125	211.133
m558	Veratrole	C8 H10 O2	138.068	139.075
m559	Gomisin O	C23 H28 O7	416.184	415.177
m560	Fargesin	C21 H22 O6	370.14	371.148
m561	Artemether	C16 H26 O5	298.178	299.185
m562	Stearamide	C18 H37 N O	283.287	284.294
m563	Demethylnobiletin	C20 H20 O8	388.115	389.123
m564	Isomucronulatol	C17 H18 O5	302.115	303.122
m565	D-Sorbitol 6-phosphate	C6 H15 O9 P	262.045	263.052
m566	Oleamide	C18 H35 N O	281.271	282.278
m567	Maltitol	C12 H24 O11	344.131	345.139
m568	N-Acetylglucosamine	C8 H15 N O6	221.09	222.097
m569	N-Acetyl-D-lactosamine	C14 H25 N O11	383.142	384.15
m570	3-(3,4-dihydroxyphenyl)propanoic acid	C9 H10 O4	164.047	165.054
m571	Perillene	C10 H14 O	150.104	151.112
m572	Oleoyl ethylamide	C20 H39 N O	309.303	310.31
m573	N-p-Coumaroylspermidine	C16 H25 N3 O2	291.194	292.202
